# Supplementary material for: pH-Responsive Nanoemulsions Based on a Dynamic Covalent Surfactant
Source: Nanomaterials (Basel). 2021 May 25;11(6):1390. doi: 10.3390/nano11061390 (PMC8227844; doi:10.3390/nano11061390)
Supplement: Supplementary file 1 [file nanomaterials-11-01390-s001.zip › nanomaterials-1229736-supplementary.pdf]

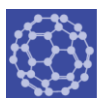

# pH-Responsive Nanoemulsions Based on a Dynamic Covalent Surfactant

Gaihuan Ren, Bo Li, Lulu Ren, Dongxu Lu, Pan Zhang, Lulu Tian, Wenwen Di, Weili Shao,\* Jianxin He,\* and Dejun Sun\*

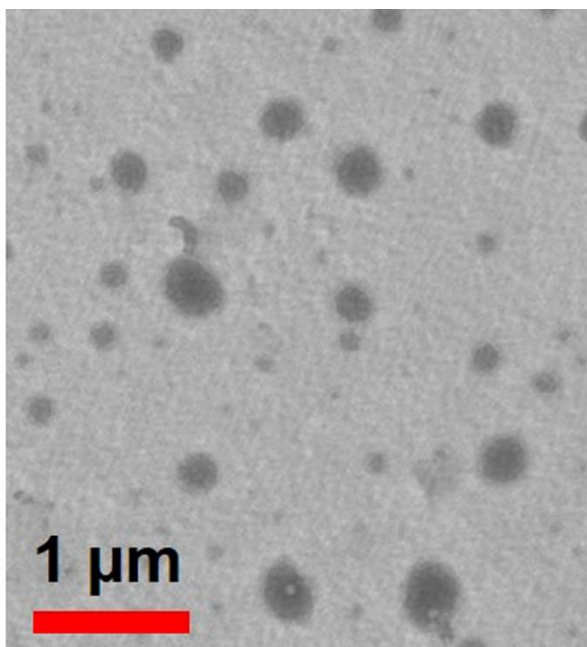

**Figure S1.** Transmission Electron Microscope (TEM) image of nano-emulsion stabilized by 2.0 wt % taurine-p-decyloxybenzaldehyde (T-DBA) at pH 10.

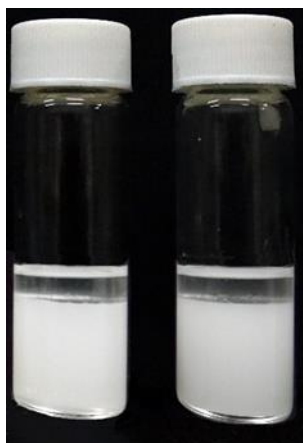

**Figure S2.** Optical photographs of emulsions (immediately after sonication) stabilized by 1.5 wt % taurine (left) and 1.5 wt % pDBA (right) with volume ratio of liquid paraffin to water of 1:5.

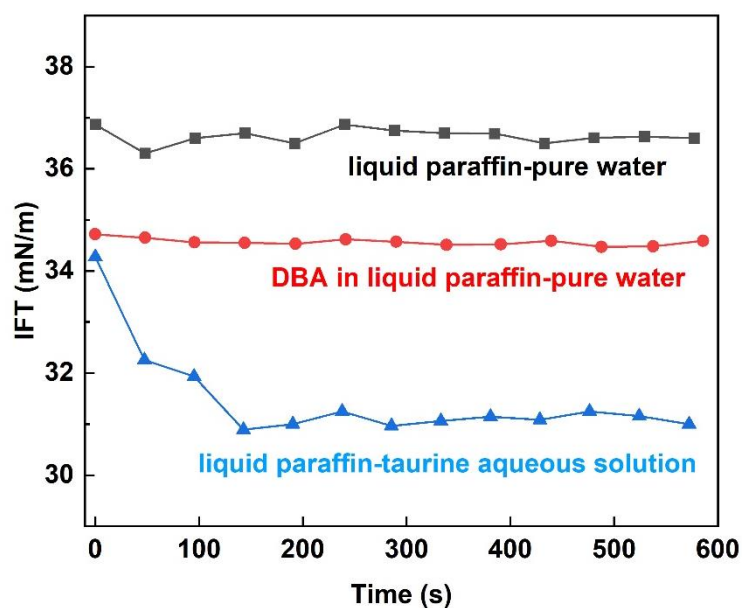

**Figure S3.** Dynamic interfacial tension (IFT) of liquid paraffin-pure water, DBA liquid paraffin solution-pure water, and liquid paraffin-taurine aqueous solution. The concentration of DBA in the liquid paraffin phase is 0.1 mM and taurine in the aqueous phase is 0.1 mM.

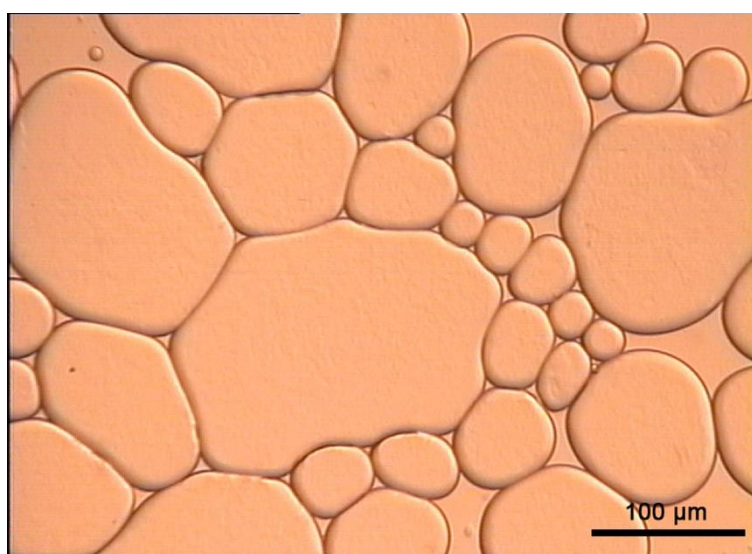

**Figure S4** Optical micrograph of the liquid paraffin in water (1:5, *v/v*) emulsion taken 10 min after changing the pH from 10 to 3. The emulsion was prepared 1.5 wt % T-DBA at pH 10.

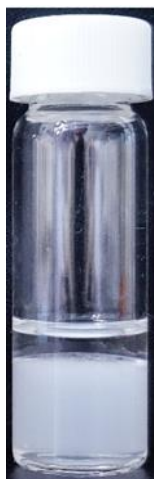

**Figure S5.** Photograph of phase separated system after re-sonication at pH 3.

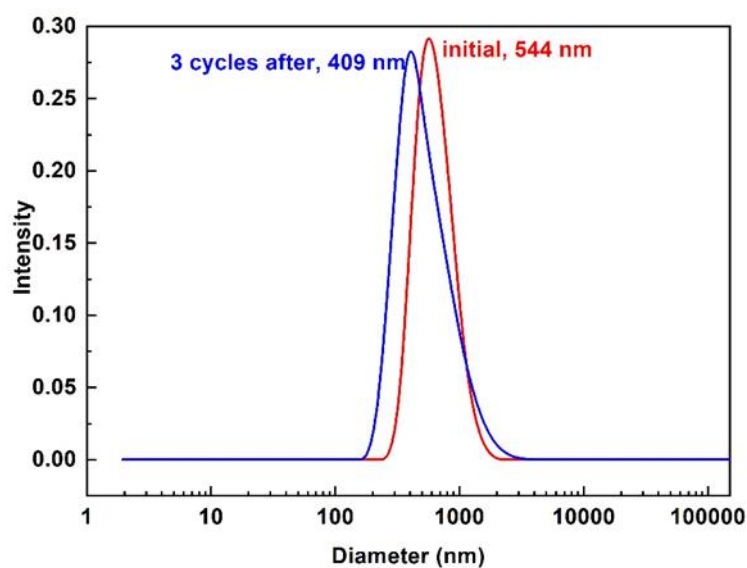

**Figure S6.** Droplet size and droplet size distribution curves for the liquid paraffin in water (1:5,  $v/v$ ) nano-emulsions prepared with 1.5 wt % T-DBA at pH 10, initially prepared and after 3 emulsification/demulsification cycles.

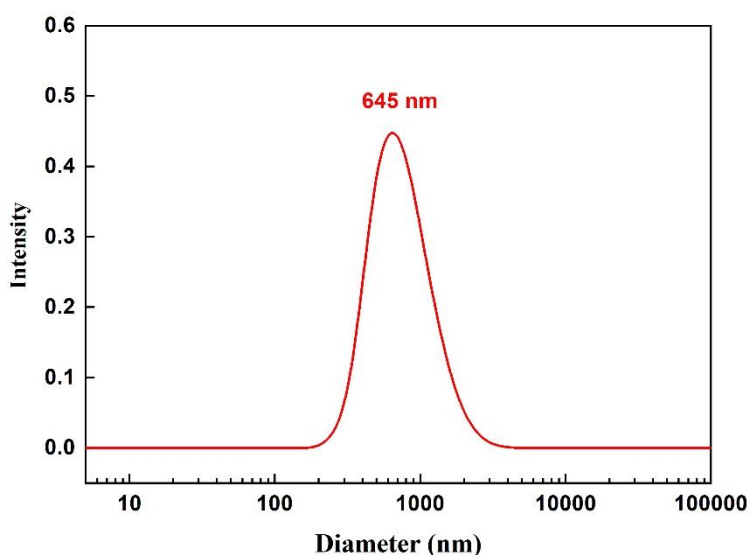

**Figure S7.** Droplet size and droplet size distribution curve for the crude oil in water nano-emulsions prepared with 1.5 wt % T-DBA at pH 10.

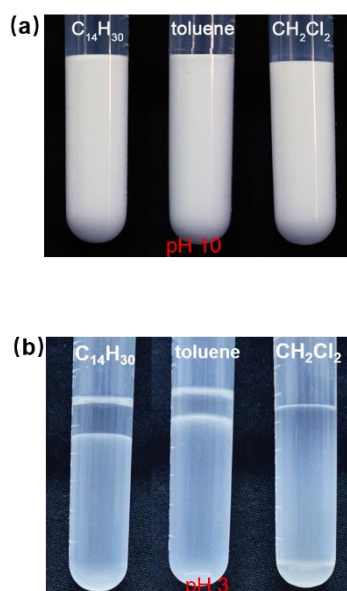

**Figure S8.** Photographs of 1.5 wt % T-DBA stabilized oil in water (1:5, *v/v*) nano-emulsions with different types of oil at pH 10 (a, stable emulsion) and at pH 3 (b, 30 min after adding HCl, complete phase separation). Photograph (a) was taken 12 h after the initial prepared nano-emulsion, photograph (b) was taken 30 min after the decreasing pH from 10 to 3.

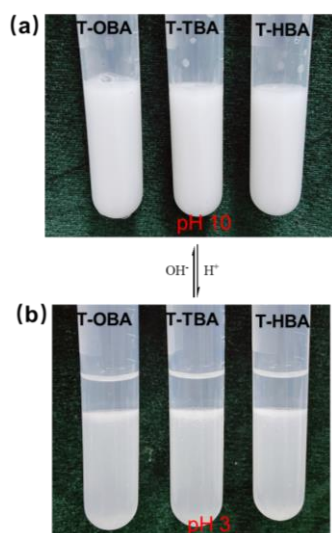

**Figure S9.** Photographs of 1.5 wt% T-OBA, T-TBA or T-HBA stabilized liquid paraffin in water (1:5, *v/v*) nano-emulsions at pH 10 (a, stable nano-emulsion) and at pH 3 (b, 30 min after adding HCl, complete phase separation). Photograph (a) was taken 12 h after the initial prepared emulsion, photograph (b) was taken 30 min after the decreasing the pH from 10 to 3.
